# Supplementary material for: Cancer–leukocyte hybrid membrane-cloaked magnetic beads for the ultrasensitive isolation, purification, and non-destructive release of circulating tumor cells
Source: Royal Society of Chemistry journal article supplement (doi:10.1039/d0nr04097e), 2020-01-01
Supplement: d0nr04097e1.pdf [file d0nr04097e1.pdf]

## **Cancer-Leukocyte Hybrid Membrane-Cloaked Magnetic Beads for Ultrasensitive Isolation, Purification and non-destructive Release of Circulating Tumor Cells**

Zhi-min Chang,<sup>a,b</sup> Rui Zhang,<sup>b</sup> Chao Yang,<sup>\*,c</sup> Dan Shao,<sup>c</sup> Yuguo Tang,<sup>a,b</sup> Wen-fei Dong<sup>\*,b</sup> and Zheng Wang,<sup>\*,b</sup>

<sup>a</sup> Academy for Engineering & Technology, Fudan University, Shanghai 200433, China.

<sup>b</sup> CAS Key Laboratory of Bio-Medical Diagnostics, Suzhou Institute of Biomedical Engineering and Technology, Chinese Academy of Sciences, Suzhou 215163, China.

<sup>c</sup> Institutes of Life Sciences, School of Biomedical Sciences and Engineering and National Engineering Research Center for Tissue Restoration and Reconstruction, South China University of Technology, Guangzhou International Campus, Guangzhou, 510006, China.

\* Corresponding author.

Suzhou Institute of Biomedical Engineering and Technology (SIBET), Chinese Academy of Sciences (CAS), 88 Keling RD, Suzhou, Jiangsu, China, 215163

Tel: +86-512-6958-8307

Fax: +86-512-6958-8088

E-mail addresses: wangz@sibet.ac.cn (Z. Wang), wenfeidong@sibet.ac.cn (W.-F. Dong), chaoyang@scut.edu.cn (Y. Chao)

## **Materials and Reagents**

The chemicals iron (III) chloride anhydrous ( $\text{FeCl}_3$ ), polyacrylic acid (PAA), diethylene glycol (DEG), 3-Mercaptopropyltrimethoxysilane (MPTMS, 95%), Hoechst 33258, and Sulforhodamine B (SRB) were bought from the Sigma-Aldrich Co. (St Louis, MO, USA). The antibody of epithelial cell adhesion molecule (EpCAM) (PE594 labeled) was obtained from Novus Biologicals. Phycoerythrin-conjugated anti-cytokeratin (PE-anti-CK) and fluorescein isothiocyanate-conjugated anti-human CD45 (FITC-anti-CD45) were purchased from BD Biosciences (USA).

## **Characterization**

Transmission electron microscopy (TEM) images were obtained with a JEM-2100F transmission electron microscope (JEOL Ltd, Japan) with a 200 kV voltage. The size of nanoparticles was measured on a Zeta PALS + BI-90Plus system. Magnetic properties were measured by VSM at 300 K. The UV-visible absorption spectra were obtained on a U-3310 spectrophotometer (Hitachi, Japan).

## Figure Caption

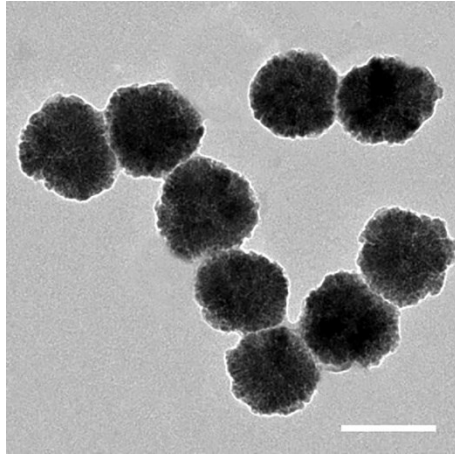

**Figure S1.** TEM image of MBs (scale bar =100 nm).

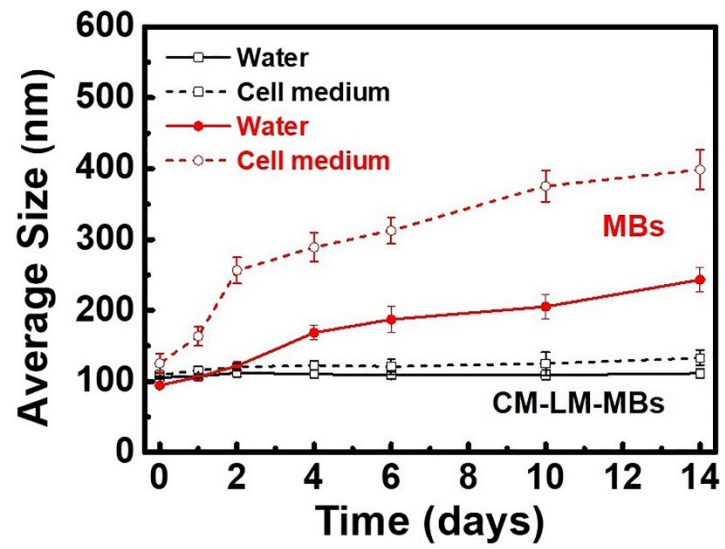

**Figure S2.** Hydrodynamic size of CM-LM-MBs and MBs in pure water and cell medium after 14 days. Data represent the mean  $\pm$  SD. (n=3).

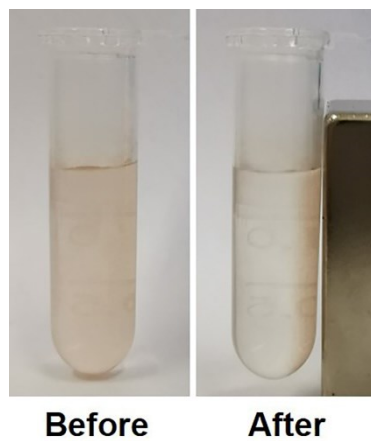

**Figure S3.** The digital photos of CM-LM-MBs before and after magnetic separation.

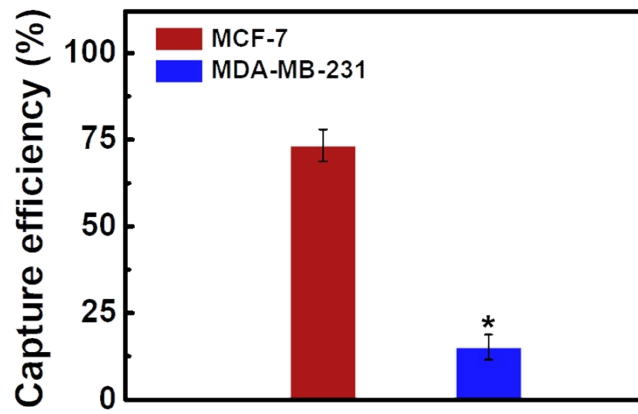

**Figure S4.** The capture efficiency of CM-LM-MBs towards MCF-7 cells and MDA-MB-231 cells. \*P < 0.05 versus MCF-7 groups; Data represent the mean  $\pm$  SD. (n = 5).

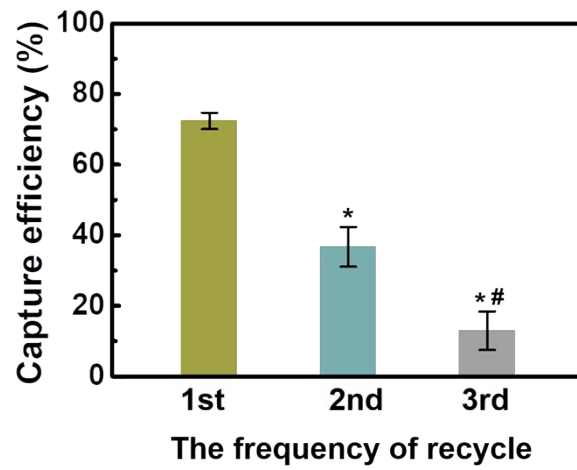

**Figure S5.** The capture efficiency of CM-LM-MBs towards MCF-7 cells after first second and third recycle. \*P < 0.05 versus 1<sup>st</sup> groups; #P < 0.05 versus 2<sup>nd</sup> groups; Data represent the mean  $\pm$  SD. (n = 5).

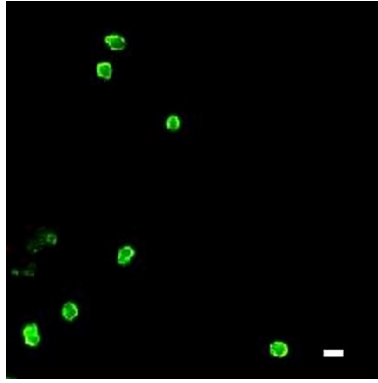

**Figure S6.** Fluorescence images of calcein AM/propidium iodide co-stained captured 4T1 cells (scale bar =10  $\mu\text{m}$ ).
